# Supplementary material
Source: publisher site journal article supplement (https://www.dovepress.com/article/347878)
Supplement: Supplementary file 1 [file get_supplementary_file.php]

Appendix 1: Outcome and variable definitions

| Variables | Definitions |
| --- | --- |
| Mode of Delivery | Cesarean delivery or vaginal delivery; include operative vaginal delivery |
| Active phase of labor42 | Starts at 3-4 cm cervical dilation |
| Cesarean section indication | As reported in delivery records, diagnosed after labor was in active phase:   - Cephalopelvic disproportion; including arrest of cervical dilatation or arrest of fetal descent for 4 hours with sustained, adequate uterine contraction43,44 - Non-reassuring fetal status - Fail induction of labor |
| Arrest of cervical dilatation42 | No cervical dilatation > 2 hour |
| Arrest of fetal descent42 | No fetal descent > 1 hour |
| Fail induction of labor45 | The inability to achieve cervical dilatation > 4 cm within 24 hours of induction |
| Non-reassuring fetal status | As recorded at delivery records, presenting in abnormal fetal heart rate pattern interpreted by electronic fetal monitoring definition24 |
| Primary method of induction | The first method of labor induction as reported in delivery records |
| Maternal age | Age of the mother at time of induction, in complete year |
| Maternal height | As reported in antenatal records, in centimeters |
| Maternal weight (pre-pregnancy) | A self-reported weight, if they were missing then the weight of first visit antenatal care were collected, in kilograms |
| Maternal height (at-delivery) | As recorded at admission records, in kilograms |
| Weight gain during pregnancy | The difference between pre-pregnancy weight and last recorded maternal weight during pregnancy; in kilograms |
| Body Mass Index (BMI) | [(weight in kilograms)/ (height in meters)2] |
| Gravidity | The number of times the woman has been pregnant, regardless of the outcomes. As reported in antenatal records |
| Parity | The number of times the woman has given birth at gestational age more than 24 weeks. As reported in antenatal records |
| History of previous vaginal delivery | The number of times the woman has given birth by vaginal route at gestational age more than 24 weeks. As reported in antenatal records |
| Indication for Induction | As recorded in antenatal records: diabetes mellitus in pregnancy, hypertensive disorder in pregnancy, other maternal condition, fetal late term or post term, fetal growth restriction, oligohydramnios, or fetal disease |
| Cervical Exam   - Dilatation - Effacement - Bishop score | As reported in delivery records, evaluated at the time before started induction |
| Bishop score19 | System utilizes cervical dilation, position, effacement, consistency of the cervix, and fetal station. |
| Gestational Age | Gestational age at time of delivery; in complete weeks |
| Estimated fetal weight by ultrasound | Last evaluation as reported in antenatal records, in grams |
| Amniotic fluid | Last evaluation as reported in antenatal records including amniotic fluid index (AFI) or single deepest pocket (SDP) of amniotic fluid; normal, oligohydramnios, polyhydramnios |
| Normal amniotic fluid46 | AFI 5 - 25 cm or SDP 2 - 8 cm |
| Oligohydramnios46 | AFI less than 5 cm or SDP less than 2 cm |
| Polyhydramnios46 | AFI more than 25 cm or SDP more than 8 cm |

Appendix 2: Equation of prediction model
